# Supplementary material for: Anti-Inflammatory Effects of Minor Cannabinoids CBC, THCV, and CBN in Human Macrophages
Source: MDPI journal article supplement (doi:10.3390/molecules28186487), 2023-09-07
Supplement: s1 [file s1]

**Table S1. The information on the primary antibodies**

| Primary antibody                    | Manufacture               | Cat #     | Dilution |
|-------------------------------------|---------------------------|-----------|----------|
| Nlrp3                               | Cell Signaling Technology | 15101S    | 1:1000   |
| Phospho-NF- $\kappa$ B-p65 (ser536) | Cell Signaling Technology | 13346S    | 1:1000   |
| NF $\kappa$ B-p-65                  | Santa Cruz Biotechnology  | sc-8008   | 1:200    |
| Phospho-TYK 2 (Tyr-1054/1055)       | Cell Signaling Technology | 9321S     | 1:500    |
| TNF $\alpha$                        | Cell Signaling Technology | 3707      | 1:500    |
| PANX-1                              | Cell Signaling Technology | 91137S    | 1:1000   |
| PPAR $\gamma$                       | Cell Signaling Technology | 2430      | 1:1000   |
| Cox-2                               | Cell Signaling Technology | 12282     | 1:1000   |
| Cleaved Caspase-1                   | Cell Signaling Technology | 4199      | 1:500    |
| cPLA2                               | Santa Cruz Biotechnology  | sc-376618 | 1:200    |
| CB1R                                | Santa Cruz Biotechnology  | sc-293419 | 1:200    |
| $\beta$ -actin                      | Santa Cruz Biotechnology  | sc-47778  | 1:200    |
| GAPDH                               | Santa Cruz Biotechnology  | sc-32233  | 1:200    |
| Phospho-STAT-3(Tyr-705)             | Santa Cruz Biotechnology  | sc-8059   | 1:200    |
| STAT-3                              | Santa Cruz Biotechnology  | sc-8019   | 1:200    |
| Pro-Caspase-1                       | Santa Cruz Biotechnology  | sc-392736 | 1:200    |
| IL-1 $\beta$                        | Abcam                     | ab216995  | 1:500    |
| $\beta$ -actin                      | Abcam                     | ab8227    | 1:2000   |
| GAPDH                               | Cell Signaling Technology | 2118      | 1:1000   |
| $\alpha$ -tubulin                   | Santa Cruz Biotechnology  | sc-8035   | 1:200    |
| IL-6                                | Cell Signaling Technology | 12153     | 1:1000   |
| TYK-2                               | Cell Signaling Technology | 14193S    | 1:1000   |
| Phospho-STAT-1 (S727)               | Abcam                     | ab109461  | 1:1000   |
| STAT-1                              | Abcam                     | ab92506   | 1:1000   |

**Table S2. The sequence of qRT-PCR primers**

|                                 |         |                        |
|---------------------------------|---------|------------------------|
| <i>IL-6</i>                     | Forward | GGAGACTTGCCTGGTGAAA    |
|                                 | Reverse | CTGGCTTGTCCTCACTACTC   |
|                                 |         |                        |
| <i>COX-2</i>                    | Forward | TACTGGAAGCCAAGCACTTT   |
|                                 | Reverse | GGACAGCCCTTCACGTTATT   |
|                                 |         |                        |
| <i>cPLA2</i>                    | Forward | TTGGGCGTTTCTGGTTCA     |
|                                 | Reverse | CATCATCACTGTCCGAGCTATC |
|                                 |         |                        |
| <i>TNF alpha</i>                | Forward | CCAGGGACCTCTCTCTAATCA  |
|                                 | Reverse | TCAGCTTGAGGGTTTGCTAC   |
|                                 |         |                        |
| <i>Pannexin-1(PANX-1)</i>       | Forward | GTGTGCAGCATCAAATCAGG   |
|                                 | Reverse | GACACTGAGCAACTGGAAGA   |
|                                 |         |                        |
| <i>P2X7</i>                     | Forward | CTTCCGAGAAACAGGCGATAA  |
|                                 | Reverse | TAGGTTGCAGTCCAGTAGA    |
|                                 |         |                        |
| <i>ADAR1</i>                    | Forward | GTCATCAATGGCCGAGAGTT   |
|                                 | Reverse | CTTGGCTTTGGCTTCCTCTA   |
|                                 |         |                        |
| <i>Nlrp3</i>                    | Forward | GAAGAGGAGTGGATGGGTTTAC |
|                                 | Reverse | TCTGCTTCTCACGTACTTTCTG |
|                                 |         |                        |
| <i>IL-1<math>\beta</math></i>   | Forward | CCTTAGGGTAGTGCTAAGAGGA |
|                                 | Reverse | AAGTGAGTAGGAGAGGTGAGAG |
|                                 |         |                        |
| <i><math>\beta</math>-ACTIN</i> | Forward | GGCATCCTCACCTGAAGTA    |
|                                 | Reverse | CACACGCAGCTCATTGTAGAAG |
|                                 |         |                        |
| <i>GAPDH</i>                    | Forward | CAGGAGGCATTGCTGATGAT   |
|                                 | Reverse | GAAGGCTGGGGCTCATTT     |
